# Supplementary material
Source: publisher site journal article supplement (https://www.e-cmh.org/upload/media/cmh-2023-0131-Supplementary-Table-1.pdf)
Supplement: Supplementary file 1 [file cmh-2023-0131-Supplementary-Table-1.pdf]

**Supplementary Table 1.** Search strategies with query terms  
PubMed

| No. | Search Query                                                                                                                                                                                                                                                                          | Results          |
|-----|---------------------------------------------------------------------------------------------------------------------------------------------------------------------------------------------------------------------------------------------------------------------------------------|------------------|
| #1  | "Carcinoma, Hepatocellular"[Mesh] OR "Liver Neoplasms"[Mesh:NoExp]                                                                                                                                                                                                                    | 177,148          |
| #2  | (unresectab*[TW] OR intermediate-stage*[TW] OR Early[TW] OR Early-stage*[TW] OR small[TW]) AND (hepatocellular-carcinoma*[TW] OR hepatocellular-carcinoma*[TW] OR liver-cancer*[TW] OR liver-cell-cancer*[TW] OR HCC[TW])                                                             | 27,532           |
| #3  | <b>#1 OR #2</b>                                                                                                                                                                                                                                                                       | <b>186,386</b>   |
| #4  | "Embolization, Therapeutic"[Mesh] OR Chemoembol*[TW] OR Chemo-embol*[TW] OR Radioembol*[TW] OR Radio-embol*[TW]                                                                                                                                                                       | 52,211           |
| #5  | "Radiofrequency Therapy"[Mesh] OR "Ablation Techniques"[Mesh] OR Ablation*[TW] OR cryoablation*[TW] OR Radiofrequenc*[TW] OR Radio-frequenc*[TW] OR microwave*[TW] OR thermal*[TW]                                                                                                    | 525,093          |
| #6  | "Radiotherapy"[Mesh] OR Radiotherap*[TW] OR Radio-therap*[TW] OR Radiation*[TW]                                                                                                                                                                                                       | 896,834          |
| #7  | "Radiosurgery"[Mesh] OR Radiosurger*[TW] OR Radio-surger*[TW] OR "stereotactic body radiation therap*[TW] OR SBRT[TW]                                                                                                                                                                 | 27,294           |
| #8  | ("Ethanol"[Mesh] AND "Injections"[Mesh]) OR ethanol-inject*[TW]                                                                                                                                                                                                                       | 5,651            |
| #9  | <b>#4 OR #5 OR #6 OR #7 OR #8</b>                                                                                                                                                                                                                                                     | <b>1,432,024</b> |
| #10 | "Survival"[Mesh] OR "Survival Analysis"[Mesh] OR "Survival Rate"[Mesh] OR "Progression-Free Survival"[Mesh]                                                                                                                                                                           | 491,104          |
| #11 | Survival*[TW] OR Response-rate*[TW] OR "PFS"[TW]                                                                                                                                                                                                                                      | 1,568,522        |
| #12 | <b>#10 OR #11</b>                                                                                                                                                                                                                                                                     | <b>1,622,650</b> |
| #13 | <b>#3 AND #9 AND #12</b>                                                                                                                                                                                                                                                              | <b>11,954</b>    |
| #14 | #13 NOT (Case Reports[PT] OR Letter[PT] OR meta-analys*[TW] OR metaanalys*[TW] OR "Meta-Analysis" [PT] OR case-report*[TW] OR Letter*[T]) OR "Systematic Review"[PT] OR Systematic-Review*[T]) OR Review[PT]                                                                          | 9,003            |
| #15 | <b>#14 AND ("2000/01/01"[PDAT] : "2023/02/17"[PDAT]) AND (English[Lang])</b>                                                                                                                                                                                                          | <b>7,171</b>     |
| #16 | <b>#15 AND ("Randomized Controlled Trial"[PT] OR Randomized*[TW] OR Randomised[TW] OR ((Double*[TW] OR single*[TW] OR treb*[TW] OR tripl*[TW]) AND (Blind*[TW] OR mask*[TW])) OR randomly*[TW] OR "Prospective Studies"[Mesh] OR Prospective-stud*[TW] OR Prospective-cohort[TW])</b> | <b>1,224</b>     |

**Supplementary Table 1.** Continued  
EMBASE

| No.        | Search Query                                                                                                                                                                                                                                                                                                                                         | Results          |
|------------|------------------------------------------------------------------------------------------------------------------------------------------------------------------------------------------------------------------------------------------------------------------------------------------------------------------------------------------------------|------------------|
| #1         | 'liver cell carcinoma'/exp OR 'liver cancer'/de                                                                                                                                                                                                                                                                                                      | 233,532          |
| #2         | ((unresectab* OR intermediate-stage* OR Early OR Early-stage* OR small) NEAR/6 (hepatocellular* OR hepato-cellular* OR Liver* OR liver-cell*) NEAR/6 (carcinoma* OR cancer*)):ab,ti,kw                                                                                                                                                               | 12,154           |
| <b>#3</b>  | <b>#1 OR #2</b>                                                                                                                                                                                                                                                                                                                                      | <b>235,701</b>   |
| #4         | 'chemoembolization'/exp OR 'radioembolization'/exp OR (Chemoembol* OR Chemo-embol* OR Radioembol* OR Radio-embol*):ab,ti,kw                                                                                                                                                                                                                          | 28,057           |
| #5         | 'radiofrequency ablation'/exp OR 'ablation therapy'/exp OR (Ablation* OR cryoablation* OR Radiofrequenc* OR Radio-frequenc* OR microwave* OR thermal*):ab,ti,kw                                                                                                                                                                                      | 523,002          |
| #6         | 'radiotherapy'/exp OR (Radiotherap* OR Radio-therap* OR Radiation*):ab,ti,kw                                                                                                                                                                                                                                                                         | 1,071,139        |
| #7         | 'radiosurgery'/exp OR (Radiosurger* OR Radio-surger* OR 'stereotactic body radiation therap*' OR SBRT):ab,ti,kw                                                                                                                                                                                                                                      | 92,535           |
| #8         | ('alcohol'/exp AND 'injection'/exp) OR ethanol-inject*:ab,ti,kw                                                                                                                                                                                                                                                                                      | 6,985            |
| <b>#9</b>  | <b>#4 OR #5 OR #6 OR #7 OR #8</b>                                                                                                                                                                                                                                                                                                                    | <b>1,585,117</b> |
| #10        | 'overall survival'/exp OR 'survival analysis'/exp OR 'survival rate'/exp OR 'progression free survival'/exp                                                                                                                                                                                                                                          | 742,109          |
| #11        | (Survival* OR Response-rate* OR 'PFS'):ab,ti,kw                                                                                                                                                                                                                                                                                                      | 1,868,130        |
| <b>#12</b> | <b>#10 OR #11</b>                                                                                                                                                                                                                                                                                                                                    | <b>2,004,141</b> |
| <b>#13</b> | <b>#3 AND #9 AND #12</b>                                                                                                                                                                                                                                                                                                                             | <b>18,360</b>    |
| #14        | #13 NOT ([conference abstract]/lim OR [conference paper]/lim OR [conference review]/lim OR [data papers]/lim OR [editorial]/lim OR [erratum]/lim OR [letter]/lim OR [note]/lim OR [review]/lim OR [systematic review]/lim OR [meta analysis]/lim OR meta-analys*:ti OR case-report*:ti OR Letter*:ti OR Systematic-Review*:ti)                       | 9,589            |
| #15        | #14 AND (english)/lim AND [2000-2023]/py                                                                                                                                                                                                                                                                                                             | 8,366            |
| <b>#16</b> | <b>#15 AND ([article]/lim OR [article in press]/lim)</b>                                                                                                                                                                                                                                                                                             | <b>8,310</b>     |
| <b>#17</b> | <b>#16 AND ('randomized controlled trial'/exp OR [randomized controlled trial]/lim OR 'randomization'/exp OR (Random-Allocat* OR randomized OR randomised OR randomly*):ab,ti,kw OR ((Double* OR single* OR treb* OR trip*) NEAR/3 (Blind* OR mask*)):ab,ti,kw OR 'prospective study'/exp OR (Prospective-stud* OR Prospective-cohort):ab,ti,kw)</b> | <b>1,260</b>     |

**Supplementary Table 1.** Continued  
 Cochran Library trials

| No.        | Search Query                                                                                                                                                                            | Results        |
|------------|-----------------------------------------------------------------------------------------------------------------------------------------------------------------------------------------|----------------|
| #1         | [mh "Carcinoma, Hepatocellular"] or [mh ^"Liver Neoplasms"]                                                                                                                             | 3,832          |
| #2         | [(unresectabl* OR intermediate-stage* OR Early OR Early-stage* OR small) NEAR/6 (hepatocellular* OR hepato-cellular* OR Liver* OR liver-cell*) NEAR/6 (carcinoma* OR cancer*)];ab,ti,kw | 1,090          |
| <b>#3</b>  | <b>#1 OR #2</b>                                                                                                                                                                         | <b>4,495</b>   |
| #4         | [mh "Embolization, Therapeutic"] OR (Chemoembol* OR Chemo-embol* OR Radioembol*);ab,ti,kw                                                                                               | 2,182          |
| #5         | [mh "Radiofrequency Therapy"] OR [mh "Ablation Techniques"] OR (Ablation* OR cryoablation* OR Radiofrequenc* OR Radio-frequenc* OR microwave* OR thermal*);ab,ti,kw                     | 21,542         |
| #6         | [mh "Radiotherapy"] OR (Radiotherap* OR Radio-therap* OR Radiation*);ab,ti,kw                                                                                                           | 54,667         |
| #7         | [mh "Radiosurgery"] OR (Radiosurger* OR Radio-surger* OR 'stereotactic body radiation therap*' OR SBRT);ab,ti,kw                                                                        | 1,973          |
| #8         | ([mh "Ethanol"] AND [mh "Injections"]) OR ethanol-inject*;ab,ti,kw                                                                                                                      | 307            |
| <b>#9</b>  | <b>#4 OR #5 OR #6 OR #7 OR #8</b>                                                                                                                                                       | <b>76,011</b>  |
| #10        | [mh "Survival"] or [mh "Survival Analysis"] or [mh "Survival Rate"] or [mh "Progression-Free Survival"]                                                                                 | 35,373         |
| #11        | (Survival* OR Response-rate* OR 'PFS');ab,ti,kw                                                                                                                                         | 144,998        |
| <b>#12</b> | <b>#10 OR #11</b>                                                                                                                                                                       | <b>149,947</b> |
| <b>#13</b> | <b>#3 AND #9 AND #12</b>                                                                                                                                                                | <b>1,036</b>   |
| <b>#14</b> | <b>#13 in Trials (Published); 2000-2023</b>                                                                                                                                             | <b>581</b>     |

**Supplementary Table 1.** Continued  
CINAHL

| No.        | Search Query                                                                                                                                                           | Results        |
|------------|------------------------------------------------------------------------------------------------------------------------------------------------------------------------|----------------|
| S1         | (MH "Carcinoma, Hepatocellular") OR (MH "Liver Neoplasms")                                                                                                             | 22,872         |
| S2         | (unresectab* OR intermediate-stage* OR Early OR Early-stage* OR small) N6 (hepatocellular* OR hepato-cellular* OR Liver* OR liver-cell*) N6 (carcinoma* OR cancer*)    | 1,745          |
| <b>S3</b>  | <b>S1 OR S2</b>                                                                                                                                                        | <b>23,335</b>  |
| S4         | (MH "Embolization, Therapeutic+") OR (MH "Radiofrequency Therapy+") OR (MH "Ablation Techniques+")                                                                     | 49,041         |
| S5         | Chemoembol* OR Chemo-embol* OR Radioembol* OR Radio-embol* OR Ablation* OR cryoablation* OR Radiofrequenc* OR Radio-frequenc* OR microwave* OR thermal*                | 55,288         |
| S6         | (MH "Radiotherapy+") OR (MH "Radiosurgery")                                                                                                                            | 41,703         |
| S7         | Radiotherap* OR Radio-therap* OR Radiation* OR Radiosurger* OR Radio-surger* OR "stereotactic body radiation therap*" OR SBRT                                          | 131,144        |
| S8         | ethanol-inject*                                                                                                                                                        | 246            |
| <b>S9</b>  | <b>S4 OR S5 OR S6 OR S7 OR S8</b>                                                                                                                                      | <b>205,473</b> |
| S10        | (MH "Survival") OR (MH "Survival Analysis+")                                                                                                                           | 149,023        |
| S11        | Survival* OR Response-rate* OR "PFS"                                                                                                                                   | 266,573        |
| <b>S12</b> | <b>S10 OR S11</b>                                                                                                                                                      | <b>305,201</b> |
| <b>S13</b> | <b>S3 AND S9 AND S12</b>                                                                                                                                               | <b>2,487</b>   |
| <b>S14</b> | <b>S13 Limiters Published Date: 20000101-20230217; Research Article; Language: Englis</b>                                                                              | <b>1,590</b>   |
| <b>S15</b> | <b>S14 AND (MH "Randomized Controlled Trials+" OR MH "Prospective Studies+" OR Randomized* OR Randomised* OR randomly* OR Prospective-stud* OR Prospective-cohort)</b> | <b>592</b>     |

**Supplementary Table 1.** Continued  
 Web of Science SCIE

| No. | Search Query                                                                                                                                                                             | Results          |
|-----|------------------------------------------------------------------------------------------------------------------------------------------------------------------------------------------|------------------|
| #1  | <b>TS=((unresectabl* OR intermediate-stage* OR Early OR Early-stage* OR small) NEAR/6 (hepatocellular* OR hepato-cellular* OR Liver* OR liver-cell*) NEAR/6 (carcinoma* OR cancer*))</b> | <b>11,134</b>    |
| #2  | TS=(Chemoembol* OR Chemo-embol* OR Radioembol* OR Radio-embol*)                                                                                                                          | 15,955           |
| #3  | TS=(Ablation* OR cryoablation* OR Radiofrequenc* OR Radio-frequenc* OR microwave* OR thermal*)                                                                                           | 1,956,151        |
| #4  | TS=(Radiotherap* OR Radio-therap* OR Radiation*)                                                                                                                                         | 1,046,890        |
| #5  | TS=(Radiosurger* OR Radio-surger* OR "stereotactic body radiation therap*" OR SBRT OR ethanol-inject*)                                                                                   | 39,141           |
| #6  | <b>#2 OR #3 OR #4 OR #5</b>                                                                                                                                                              | <b>2,914,592</b> |
| #7  | <b>TS=(Survival* OR Response-rate* OR "PFS")</b>                                                                                                                                         | <b>1,445,277</b> |
| #8  | <b>#1 AND #6 AND #7</b>                                                                                                                                                                  | <b>2,559</b>     |
| #9  | <b>#8 AND PY=(2000-2023) AND LANGUAGE:(English)</b>                                                                                                                                      | <b>2,440</b>     |
| #10 | <b>#9 Refined by: DOCUMENT TYPES: (ARTICLE OR EARLY ACCESS)</b>                                                                                                                          | <b>2,057</b>     |
| #11 | <b>#10 AND (TS=(Randomized* OR Randomised OR RCT OR ((Double* OR single* OR treb* OR trip*) NEAR/6 (Blind* OR mask*)) OR randomly* OR Prospective*))</b>                                 | <b>680</b>       |
